# Supplementary material
Source: PubMed Central journal article supplement (PMC6282757)
Supplement: NIHMS978697-supplement-5.pdf [file NIHMS978697-supplement-5.pdf]

## **SUPPLEMENTAL ITEMS**

**Movie S1. Long-term imaging allows access to cell fate heterogeneity in response to  $\gamma$ -irradiation for several days after damage.** (Related to main text Fig. 1)

Representative time-lapse data of cells exposed to 4Gy  $\gamma$ -irradiation and imaged in the course of one week every 30min. Each cell is identified with fluorescence signal from a nuclear marker. Tracking output is shown in the form of fading lines. Two representative tracks are shown: the blue line follows a cell that does not divide for the entire duration of the experiment; the orange lines follow a set of cells that divide multiple times.

**Movie S2. Damaged cells show persistent pulsatile activation of p53, which translate into accumulation of p21.** (Related to main text Fig. 3)

Representative behavior of p53-mNeonGreen and p21-mKate2 in a single cell tracked for 5 days after 10Gy  $\gamma$ -irradiation. Tracking data was used to *in silico* maintain cell in the center for ease of visualization. Quantification of fluorescence intensity over time is shown in the right.

**Movie S3. Escape events are characterized by a switch in the level of p21 and CDK2 activity.**

(Related to main text Fig. 4)

Representative behavior of p21-mKate2 and DHB-mVenus in a single escaper cell tracked for 5 days after 10Gy  $\gamma$ -irradiation. Tracking data was used to *in silico* maintain cell in the center for ease of visualization. Note that p21 degradation is tightly correlated with a switch in the cytoplasmic-nuclear ratio of DHB-mVenus (quantified in main text, Fig 3).
